# Supplementary material for: Description of a Novel Mechanism Possibly Explaining the Antiproliferative Properties of Glucocorticoids in Duchenne Muscular Dystrophy Fibroblasts Based on Glucocorticoid Receptor GR and NFAT5
Source: PubMed Central journal article supplement (PMC7731298; doi:10.3390/ijms21239225), 2020-12-03
Supplement: ijms-21-09225-s001.pdf [file ijms-21-09225-s001.pdf]

Supplementary Materials:

Supplementary Table 1. Cell culture data.

| Primary fibroblast culture | Status  | Provided by | Age (years) | Gender | Mutation/ Deletion |
|----------------------------|---------|-------------|-------------|--------|--------------------|
| UFibro                     | Healthy | Myobank (F) | 17          | Male   | NA                 |
| DMDFibro                   | DMD     | Myobank (F) | 11          | Male   | Exon 49-50         |

DMD= Duchenne muscular dystrophy.

Supplementary Table 2. Genes used in RT-qPCR.

| Gene   | Primer                                                     | Concentration        | Source     |
|--------|------------------------------------------------------------|----------------------|------------|
| NFAT5  | PrimePCR SYBRGreen Assay<br>qHsaCID0015734 intron-spanning | 1x                   | Bio-Rad    |
| UBC    | F:ATTTGGGTCGCGGTTCTTG<br>R:TGCCTTGACATTCTCGATGGT           | 1,25pmol<br>1,25pmol | IDT<br>IDT |
| HPRT1  | F: TGACACTGGCAAAACAATGCA<br>R: GGTCCTTTTCACCAGCAAGCT       | 1,25pmol<br>1,25pmol | IDT<br>IDT |
| B2M    | F:TGCTGTCTCCATGTTTGATGTATCT<br>R: TCTCTGCTCCCCACCTCTAAGT   | 1,25pmol<br>1,25pmol | IDT<br>IDT |
| RPL13A | F:CCTGGAGGAGAAGAGGAAAGAGA<br>R:CCTGGAGGAGAAGAGGAAAGAGA     | 1,25pmol<br>1,25pmol | IDT<br>IDT |
| YWHAZ  | F:ACTTTTGGTACATTGTGGCTTCAA<br>R: CCGCCAGGACAAACCAGTAT      | 1,25pmol<br>1,25pmol | IDT<br>IDT |
| SDHA   | F: TGGGAACAAGAGGGCATCTG<br>R: CCACCACTGCATCAAATTCATG       | 1,25pmol<br>1,25pmol | IDT<br>IDT |
| HMBS   | F: GGCAATGCGGCTGCAA<br>R: GGGTACCCACGCGAATCAC              | 1,25pmol<br>1,25pmol | IDT<br>IDT |
| TBP    | Unknown                                                    | 1,25pmol             | [27]       |
| AluSq  | Unknown                                                    | 1,25pmol             | [27]       |
| AluSx1 | Unknown                                                    | 1,25pmol             | [27]       |

*UBC*= ubiquitin C; *HPRT1*= hypoxanthine phosphoribosyltransferase 1; *B2M*= beta-2 microglobulin; *RPL13A*= 60S ribosomal protein L13a; *YWHAZ*= Tyrosine 3-Mono-oxygenase/Tryptophan 5-Mono-oxygenase Activation Protein, Zeta; *SDHA*= Succinate dehydrogenase complex, subunit A, *HMBS*= hydroxymethylbilane synthase, *TBP*= TATA-binding protein, *AluSq*= Alu restriction enzyme, *AluSx1*= interspersed repeat subfamily. *NFAT5*= Nuclear Factor of Activated T-cells 5.

Supplementary Table 3. Primary antibodies used in Western-blotting.

| Antigen | Primary antibody | Clone | Concentration | Source |
|---------|------------------|-------|---------------|--------|
|---------|------------------|-------|---------------|--------|

|          |                        |         |        |                          |
|----------|------------------------|---------|--------|--------------------------|
| Tubuline | Mouse monoclonal Ig G1 | B-5-1-2 | 1/1000 | Sigma-Aldrich            |
| NFAT5    | Mouse monoclonal IgG2a | F-9     | 2µg/mL | Santa-Cruz Biotechnology |

NFAT5= Nuclear Factor of Activated T-cells 5.

**Supplementary Table 4.** Primary antibodies used in immunocytochemistry.

| <b>Antigen</b> | <b>Primary antibody</b> | <b>Clone</b> | <b>Concentration</b> | <b>Source</b>            |
|----------------|-------------------------|--------------|----------------------|--------------------------|
| NFAT5 (V-18)   | Goat polyclonal IgG     | /            | 10 µg/mL             | Santa-Cruz Biotechnology |

NFAT5= Nuclear Factor of Activated T-cells 5; NCAM= neural cell adhesion molecule.

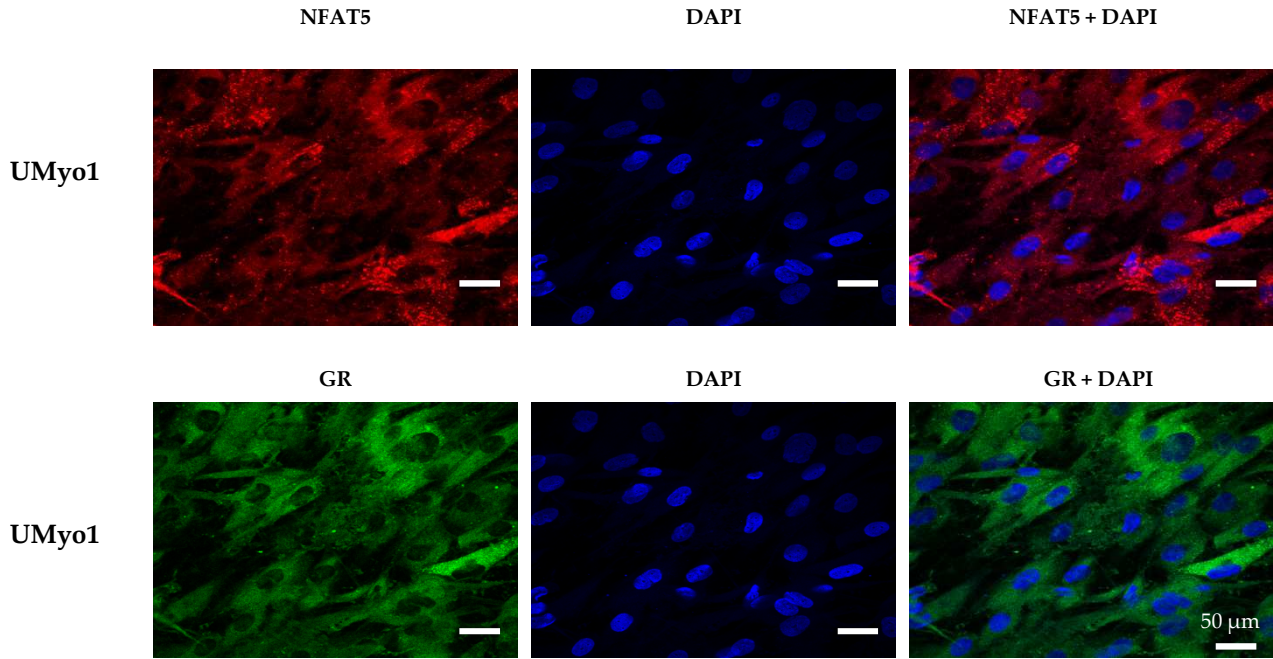

**Fig. 1: NFAT5 and GR localization in unaffected myoblasts UMyo1** NFAT5 (red) and GR (green) are visualized by immunofluorescence. Nuclei are stained in DAPI (blue) (n=3). UMyo1 have been extensively used in a previous work. GR is clearly visible as a green staining (n=3).

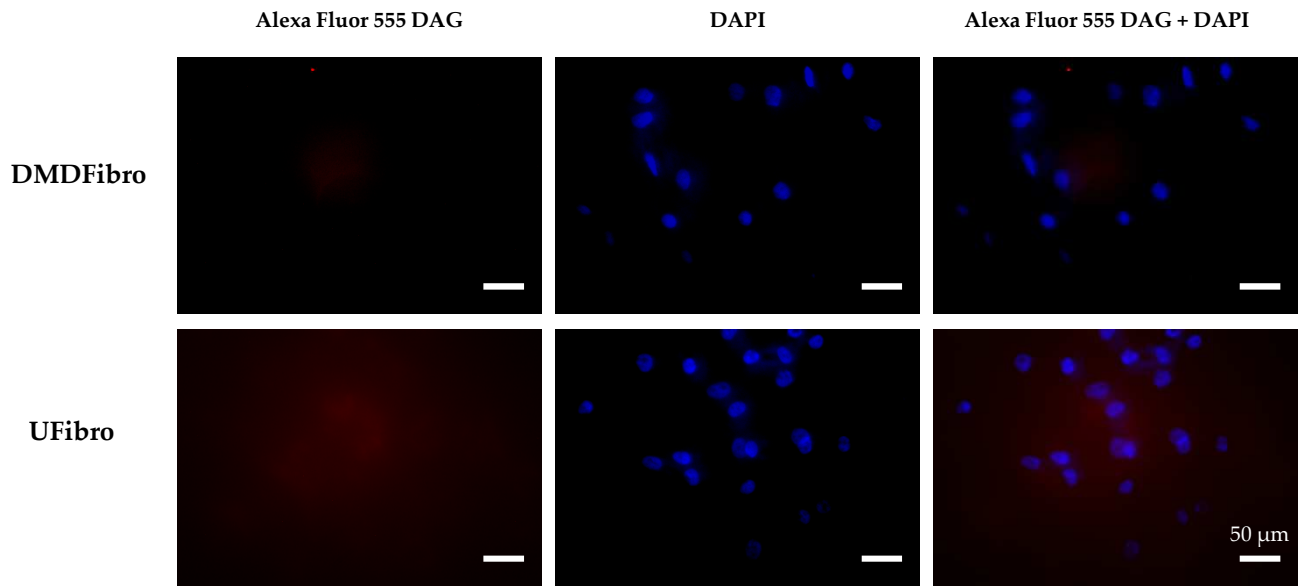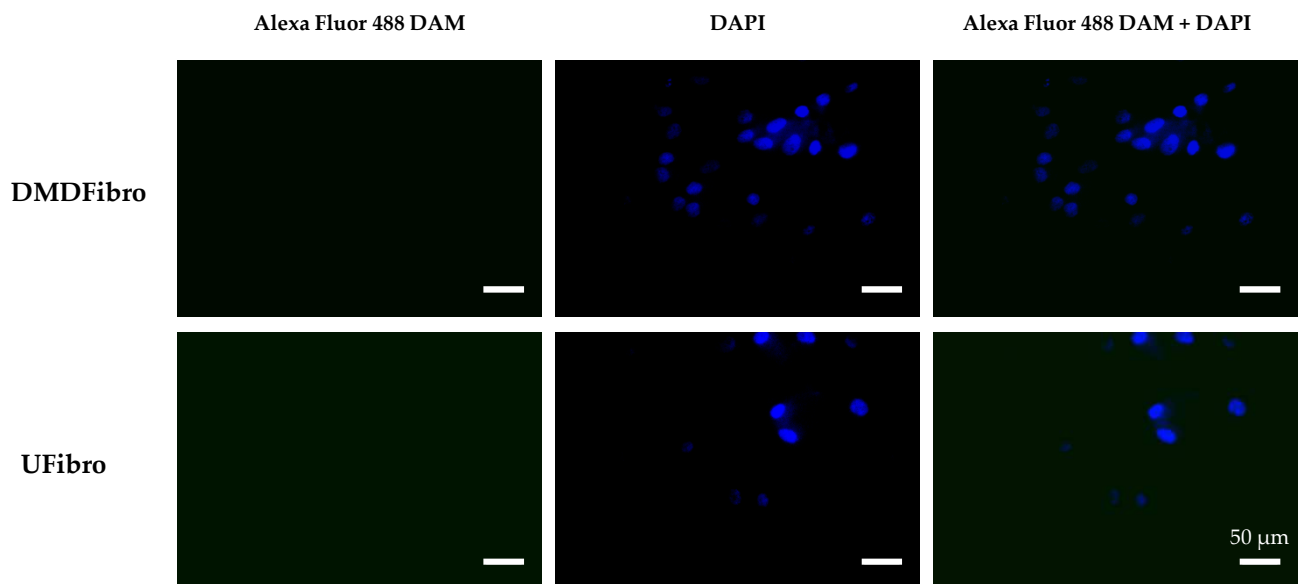

**Fig. 2: Testing of secondary antibodies in DMD and unaffected skeletal muscle fibroblasts** Alexa Fluor 555 donkey anti goat (DAM) (red) and Alexa Fluor 488 donkey anti mouse (DAM) (green) are visualized by immunofluorescence. Nuclei are stained in DAPI (blue). No staining visible in red and in green channels, pointing to absence of aspecific binding by secondary antibodies (n=3).

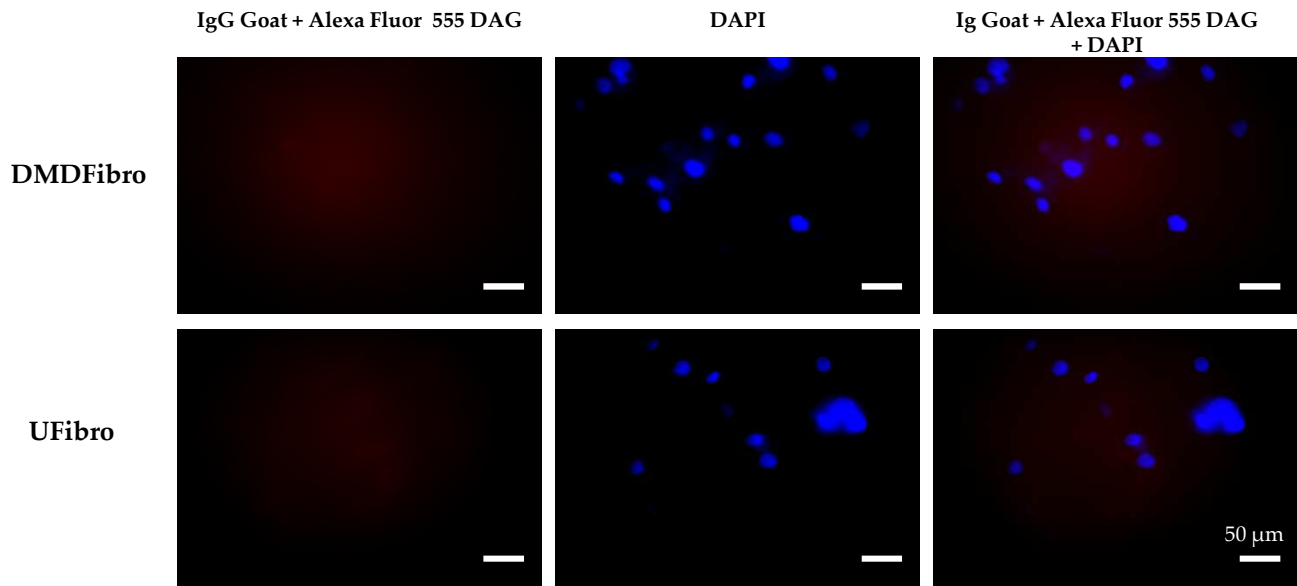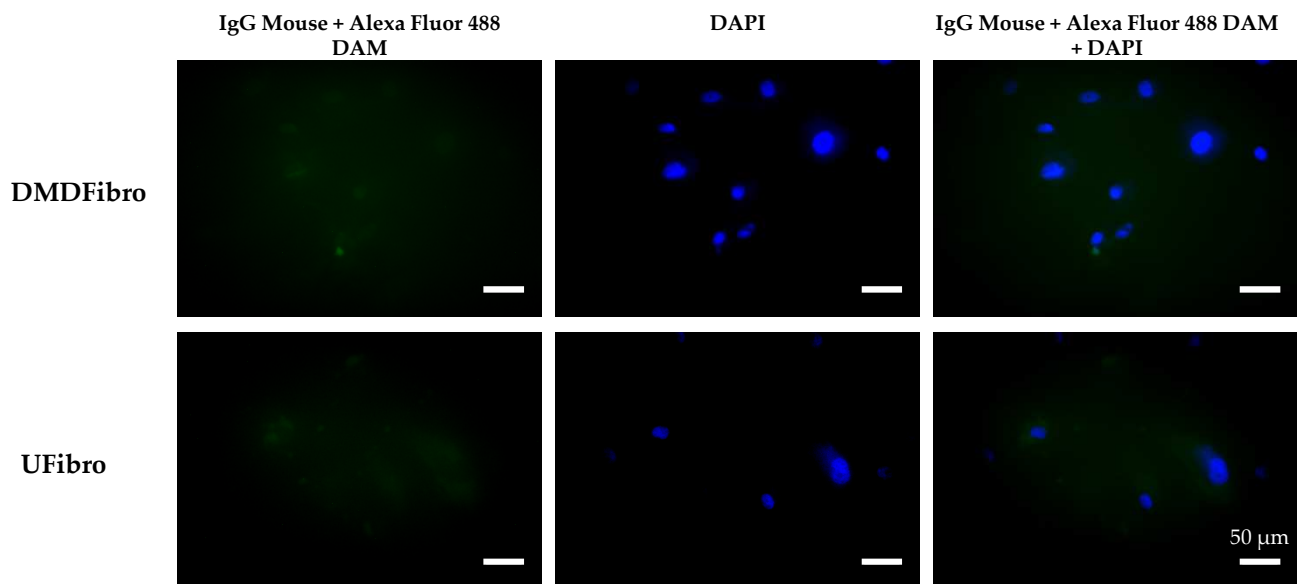

**Fig. 3: Testing of IgG Goat and IgG Mouse in DMD and unaffected skeletal muscle fibroblasts** IgG Goat (red) used in the same concentration as the NFAT5 antibody and Ig G Mouse (green) used in the same concentration as the GR antibody are visualized by immunofluorescence. Nuclei are stained in DAPI (blue). No staining visible in the red channel and minor staining in the green channel, pointing to absence of aspecific binding of animal IgG in which the antibodies were produced and harvested (n=3).

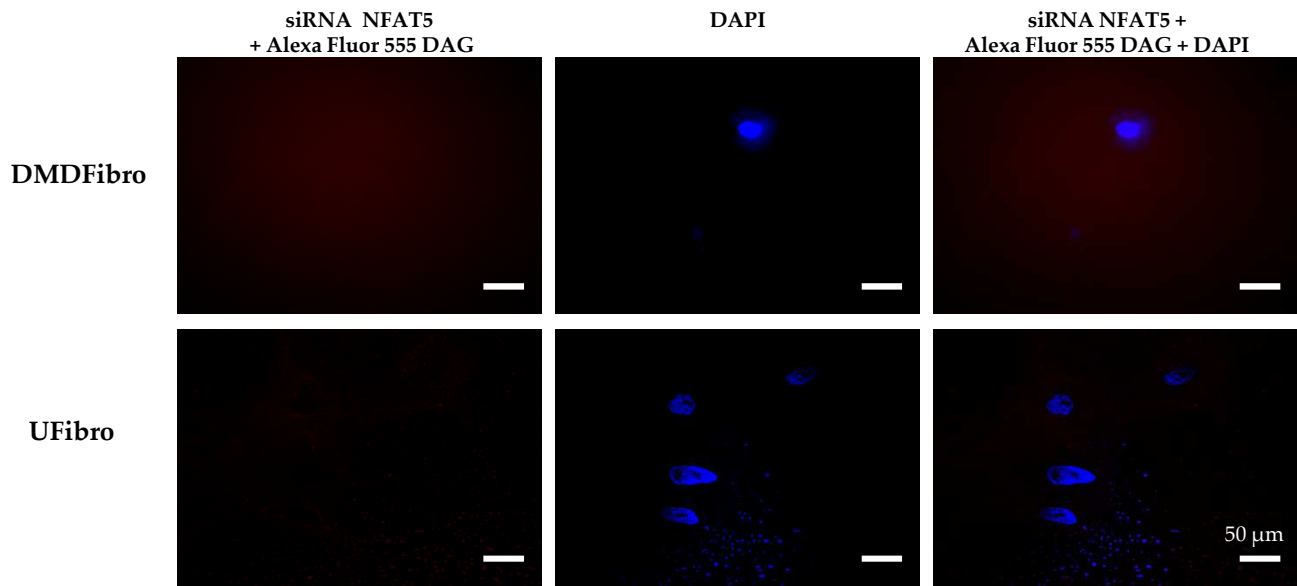

**Fig. 4: Testing of NFAT5 Goat in DMD and unaffected skeletal muscle fibroblasts** NFAT5 (red) is visualized by immunofluorescence after NFAT5 siRNA. Nuclei are stained in DAPI (blue). No staining visible in the red channel, pointing to absence of aspecific binding of NFAT5 Goat in DMD and unaffected skeletal muscle fibroblasts (n=3).

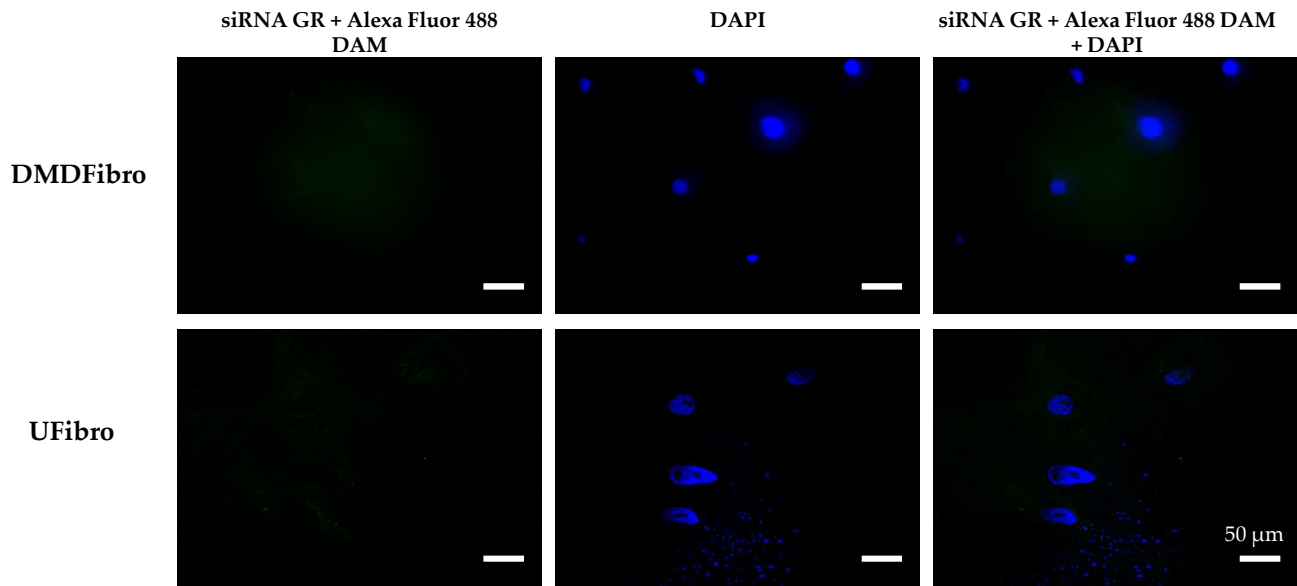

**Fig. 5: Testing of GR Mouse in DMD and unaffected skeletal muscle fibroblasts** GR (green) is visualized by immunofluorescence after GR siRNA. Nuclei are stained in DAPI (blue). No staining visible in the green channel, pointing to absence of aspecific binding of GR Mouse in DMD and unaffected skeletal muscle fibroblasts (n=3).
